# Supplementary material
Source: publisher figshare collection journal article supplement (https://acs.figshare.com/ndownloader/files/3894802)
Supplement: Supplementary file 1 [file 3894802]

## **Supporting Information**

### **Gate-Opening Gas Adsorption and Host-Guest Interacting Gas Trapping Behavior of Porous Coordination Polymers under Applied AC Electric Fields**

Wataru Kosaka, Kayo Yamagishi, Jun Zhang and Hitoshi Miyasaka\*

Corresponding author\*

Prof. Dr. Hitoshi Miyasaka

Institute for Materials Research, Tohoku University, 2-1-1 Katahira, Aoba-ku, Sendai 980-8577,  
Japan

E-mail: [miyasaka@imr.tohoku.ac.jp](mailto:miyasaka@imr.tohoku.ac.jp)

Tel: +81-22-215-2030

FAX: +81-22-215-2031

**Table S1.** Crystallographic Data for **3**

|                                                                  | <b>3</b>                                                                       |
|------------------------------------------------------------------|--------------------------------------------------------------------------------|
| formula                                                          | C <sub>44</sub> H <sub>36</sub> N <sub>2</sub> O <sub>12</sub> Ru <sub>2</sub> |
| formula weight                                                   | 986.91                                                                         |
| crystal system                                                   | triclinic                                                                      |
| space group                                                      | <i>P</i> −1                                                                    |
| <i>a</i> / Å                                                     | 9.461(3)                                                                       |
| <i>b</i> / Å                                                     | 10.660(4)                                                                      |
| <i>c</i> / Å                                                     | 10.261(4)                                                                      |
| $\alpha$ / deg                                                   | 92.650(4)                                                                      |
| $\beta$ / deg                                                    | 102.491(5)                                                                     |
| $\gamma$ / deg                                                   | 96.611(5)                                                                      |
| <i>V</i> / Å <sup>3</sup>                                        | 1000.9(6)                                                                      |
| <i>Z</i>                                                         | 1                                                                              |
| crystal size / mm <sup>3</sup>                                   | 0.050×0.010×0.010                                                              |
| <i>T</i> / K                                                     | 123(1)                                                                         |
| <i>D</i> <sub>calc</sub> / g·cm <sup>−3</sup>                    | 1.637                                                                          |
| <i>F</i> <sub>000</sub>                                          | 498.00                                                                         |
| $\lambda$ / Å                                                    | 0.71070                                                                        |
| $\mu$ (Mo K $\alpha$ ) / cm <sup>−1</sup>                        | 8.232                                                                          |
| data measured                                                    | 10994                                                                          |
| data unique                                                      | 4474                                                                           |
| <i>R</i> <sub>int</sub>                                          | 0.0625                                                                         |
| no. of observations                                              | 4474                                                                           |
| no. of variables                                                 | 271                                                                            |
| <i>R</i> 1 ( <i>I</i> > 2.00 $\sigma$ ( <i>I</i> )) <sup>a</sup> | 0.0532                                                                         |
| <i>R</i> (all reflections) <sup>a</sup>                          | 0.0697                                                                         |
| <i>wR</i> 2 (all reflections) <sup>b</sup>                       | 0.1123                                                                         |
| GOF                                                              | 1.092                                                                          |
| CCDC No.                                                         | 1003673                                                                        |

<sup>a</sup>  $R1 = R = \Sigma ||F_o| - |F_c|| / \Sigma |F_o|$ . <sup>b</sup>  $wR2 = [\Sigma w(F_o^2 - F_c^2)^2 / \Sigma w(F_o^2)^2]^{1/2}$

**Table S2.** Selected bond length (Å) and angles (°) for **3**, where  $\theta$  represents dihedral angle between the least squares planes defined by the phenyl ring of benzoate ligand and a carboxylate-bridging mode (atom set of Ru<sub>2</sub>O<sub>2</sub>C), and  $\phi$  represents an angle between a carboxylate-bridging plane and C–C bond between phenyl ring and carboxyl carbon.

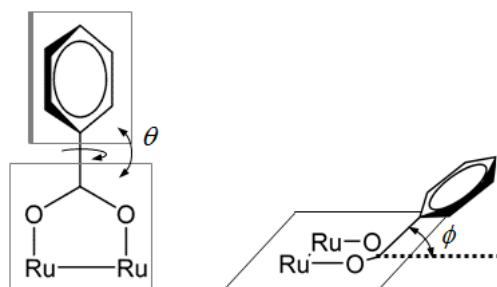

|                 | <b>1</b>             |
|-----------------|----------------------|
| Ru1–O1          | 2.049(3)             |
| Ru 1–O2a        | 2.056(3)             |
| Ru 1–O4         | 2.051(3)             |
| Ru 1–O5a        | 2.064(3)             |
| Ru 1–N1         | 2.402(4)             |
| Ru1–Ru1a        | 2.2798(9)            |
| Ru1a–Ru1–N1     | 170.07(8)            |
| $\theta$        |                      |
| set-1           | 21.9                 |
| set-2           | 29.5                 |
| $\phi$          |                      |
| set-1           | 3.7                  |
| set-2           | 6.6                  |
| Symmetry codes: | (a) $-x+1, -y+1, -z$ |

**On the oxidation state of the [Ru<sub>2</sub>] unit in **3**.** The oxidation state of [Ru<sub>2</sub>] unit can be known from the Ru–O<sub>eq</sub> length (O<sub>eq</sub> = equatorial oxygen atoms), which is quite sensitive to the oxidation state of the [Ru<sub>2</sub>] unit and to be 2.06–2.07 Å for [Ru<sub>2</sub><sup>II,II</sup>] and 2.02–2.03 Å for [Ru<sub>2</sub><sup>II,III</sup>]<sup>+</sup>.<sup>1</sup> The average Ru–O<sub>eq</sub> length of **1** is 2.055 Å, indicating an oxidation state of [Ru<sub>2</sub><sup>II,II</sup>].

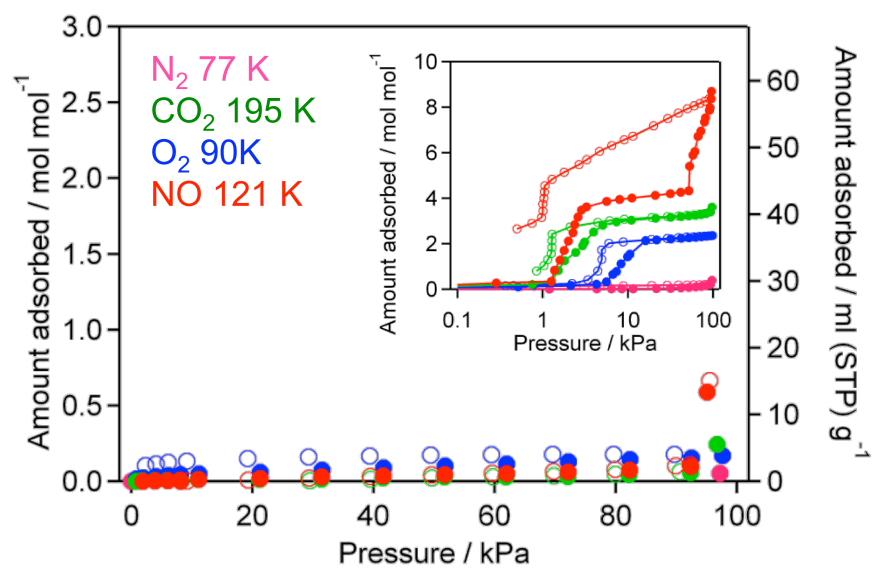

**Figure S1.** Adsorption (closed circles) and desorption (open circles) isotherms for compound **3** for several gas molecules. Inset: data for compound **1**.

**Magnetic properties of 3.** The magnetic behavior of **3** is consistent with those for isolated  $[\text{Ru}^{\text{II,II}}]$  complexes with an  $S = 1$  ground state affected by strong zero-field splitting (ZFS;  $D \approx 230 - 320 \text{ cm}^{-1}$ ) (Figure S2). The  $\chi$  and  $\chi T$  were simulated using a Curie paramagnetic model with  $S = 1$  taking into account zero-field splitting ( $D$ ), temperature-independent paramagnetism ( $\chi_{\text{TIP}}$ ), and impurity with  $S = 3/2$  ( $\rho$ ).<sup>2</sup> The best fitting parameters were:  $g = 2.0$  (fix),  $D/k_{\text{B}} = 369(1) \text{ K}$ ,  $\chi_{\text{TIP}} = 66(15) \times 10^{-6} \text{ cm}^3 \text{ mol}^{-1}$ , and  $\rho = 0.00307(3)$ .

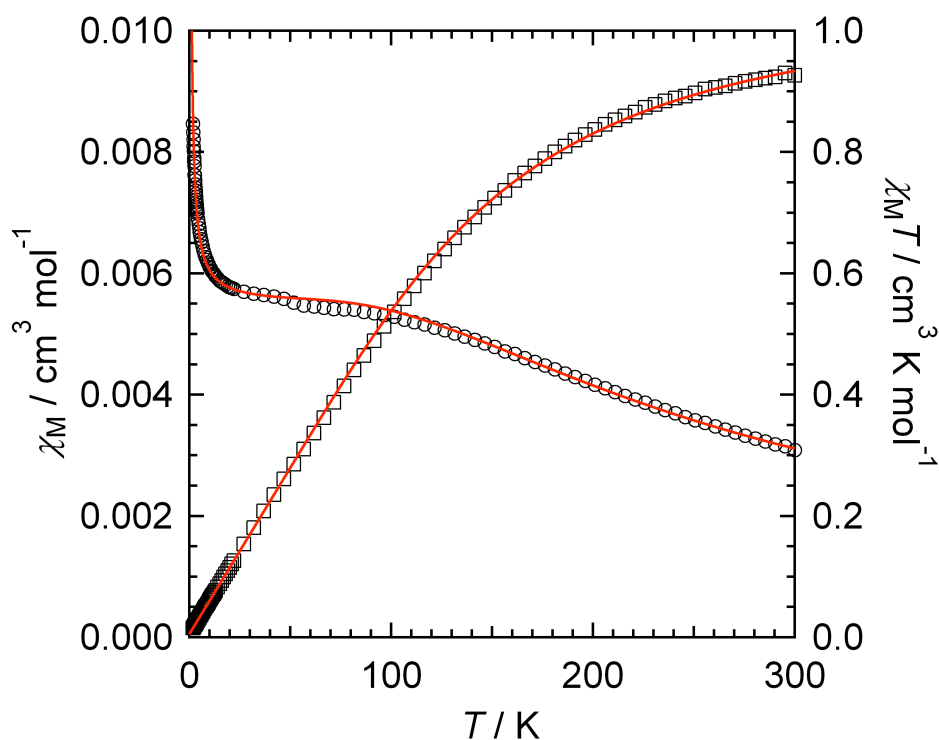

**Figure S2.** Temperature dependences of  $\chi$  ( $\circ$ ) and  $\chi T$  ( $\square$ ) for **3**, where the red solid lines represent simulated curves based on a Curie paramagnetic model with  $S = 1$  taking into account zero-field splitting ( $D$ ), temperature-independent paramagnetism ( $\chi_{\text{TIP}}$ ), and impurity with  $S = 3/2$  ( $\rho$ )

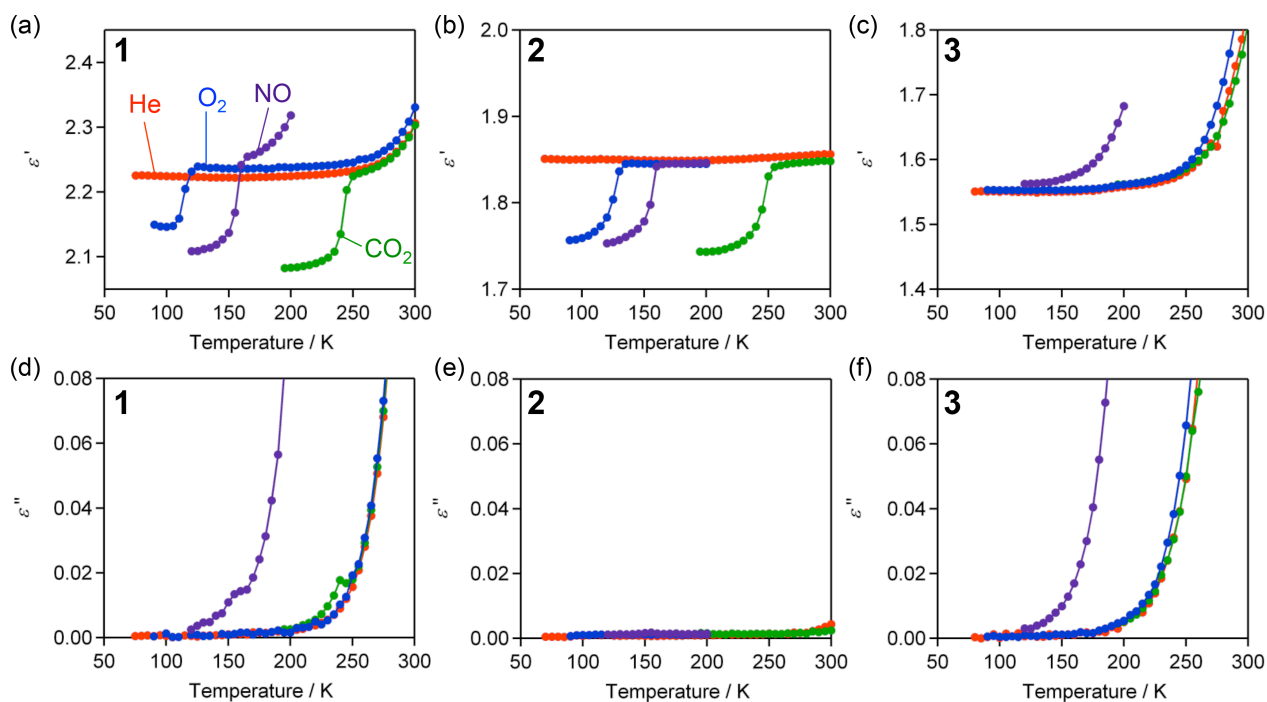

**Figure S3.** Temperature dependence of the dielectric constant (the real part ( $\epsilon'$ ), (a)–(c); the imaginary part ( $\epsilon''$ ), (d)–(f) for **1** ((a) and (d)), **2** ((b) and (e)), and **3** ((c) and (f)) measured on heating with electric field frequency of 0.1 kHz under 100 KPa of He (red), CO<sub>2</sub> (green), O<sub>2</sub> (blue), and NO (violet).

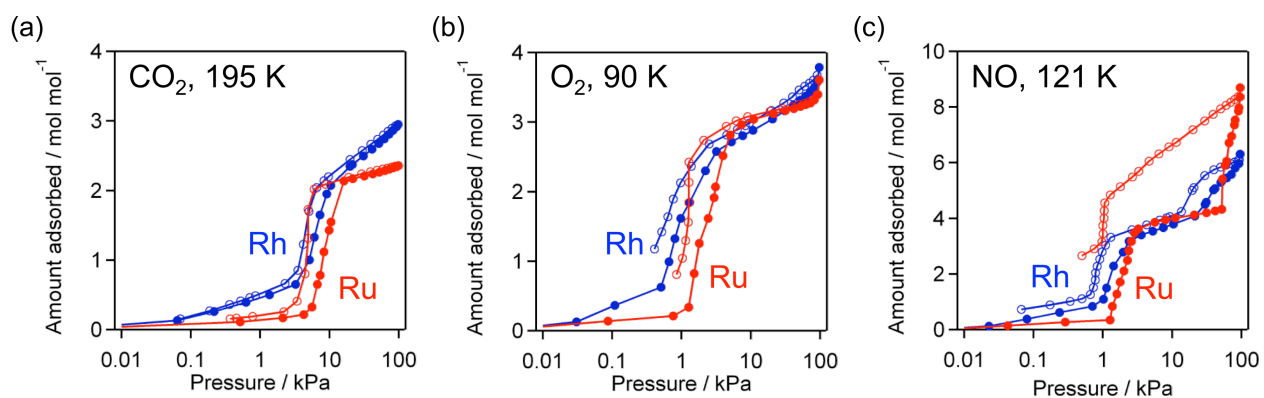

**Figure S4.** Adsorption isotherms for **1** (red) and **2** (blue);  $\text{CO}_2$  at 195 K (a),  $\text{O}_2$  at 90 K (b), and  $\text{NO}$  at 121 K (c). These plots were reproduced from the data reported previously.<sup>3</sup>

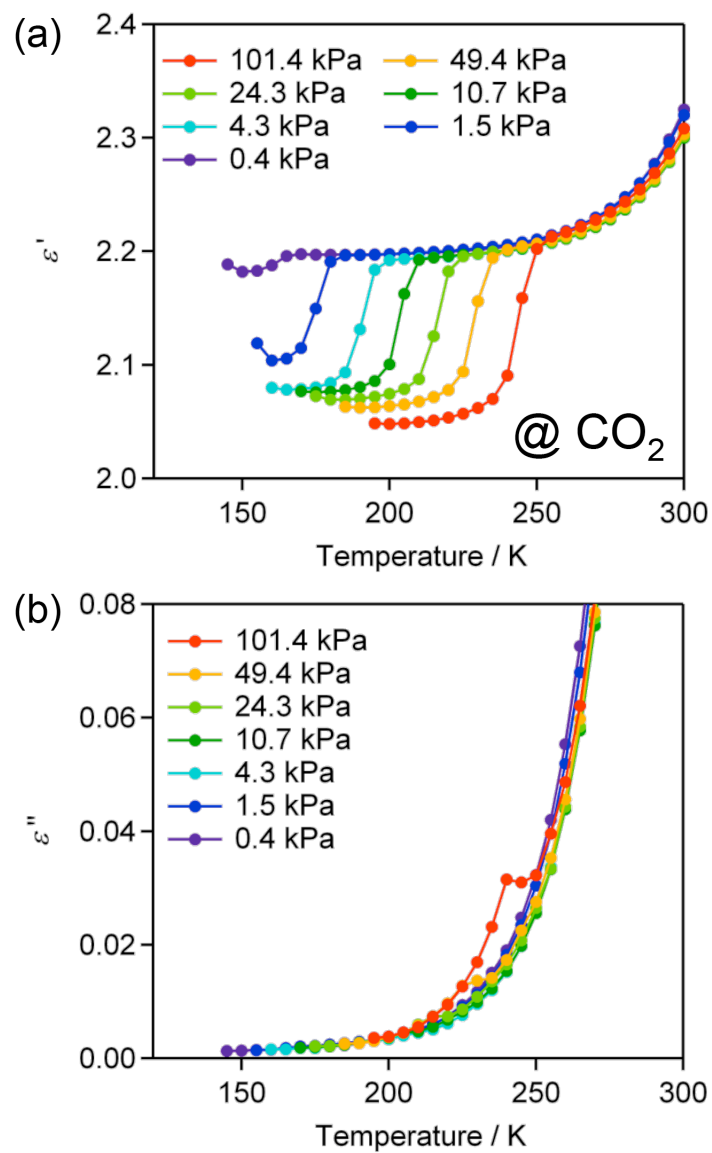

**Figure S5.** Temperature dependence of the dielectric constants of the real part ( $\epsilon'$ ) (a), and the imaginary part ( $\epsilon''$ ) (b) for **1** measured on heating under various pressure of CO<sub>2</sub> with an ac electric field frequency of 0.1 kHz.



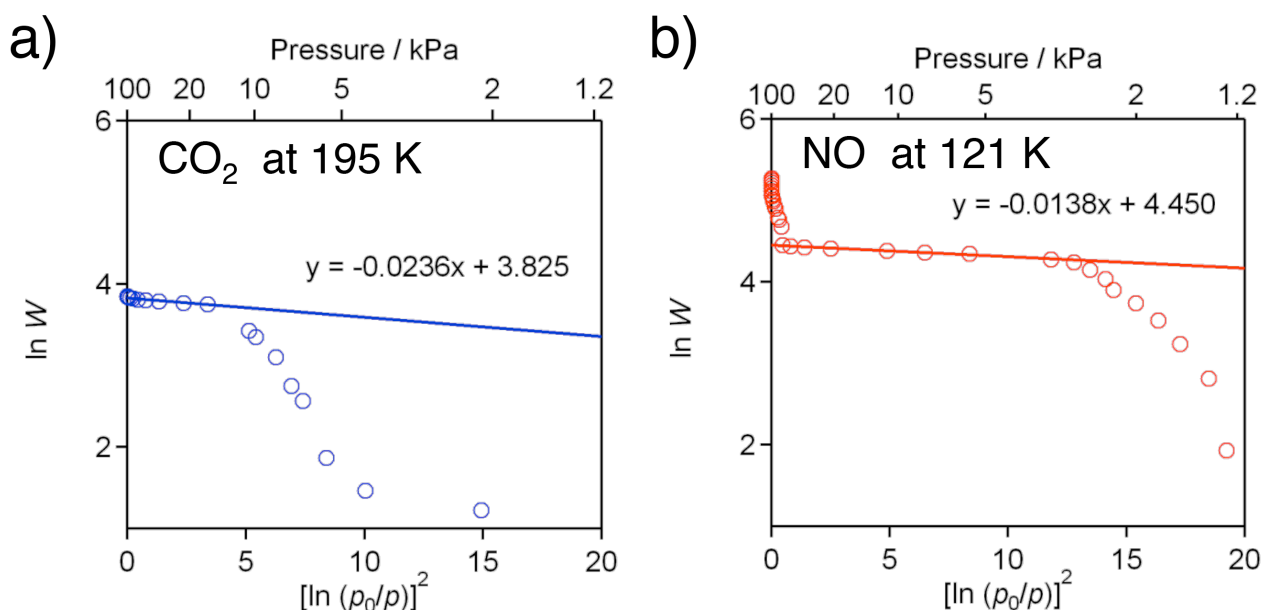

**Figure S6.** Dubinin-Raduskevich plots on the  $\text{CO}_2$  (a) and NO (b) adsorption (195 K for  $\text{CO}_2$  and 121 K for NO) for **1**, where the fitting were performed in the range for the diffusional equilibration part from after the 1<sup>st</sup> gate-opening transition to before the 2<sup>nd</sup> gate-opening transition. The fitting curves evaluate  $\beta E_0 = 10.5 \text{ kJ mol}^{-1}$  for  $\text{CO}_2$  and  $8.6 \text{ kJ mol}^{-1}$  for NO in the DR equation,  $\ln W = - (RT/\beta E_0)^2 [\ln(p_0/p)]^2 + \ln W_0$ , where  $\beta$  is the affinity coefficient and  $E_0$  is a characteristic adsorption energy.<sup>4</sup> Note that  $q_{\text{st},* = 1/e} = \beta E_0 + \Delta H_v$ .

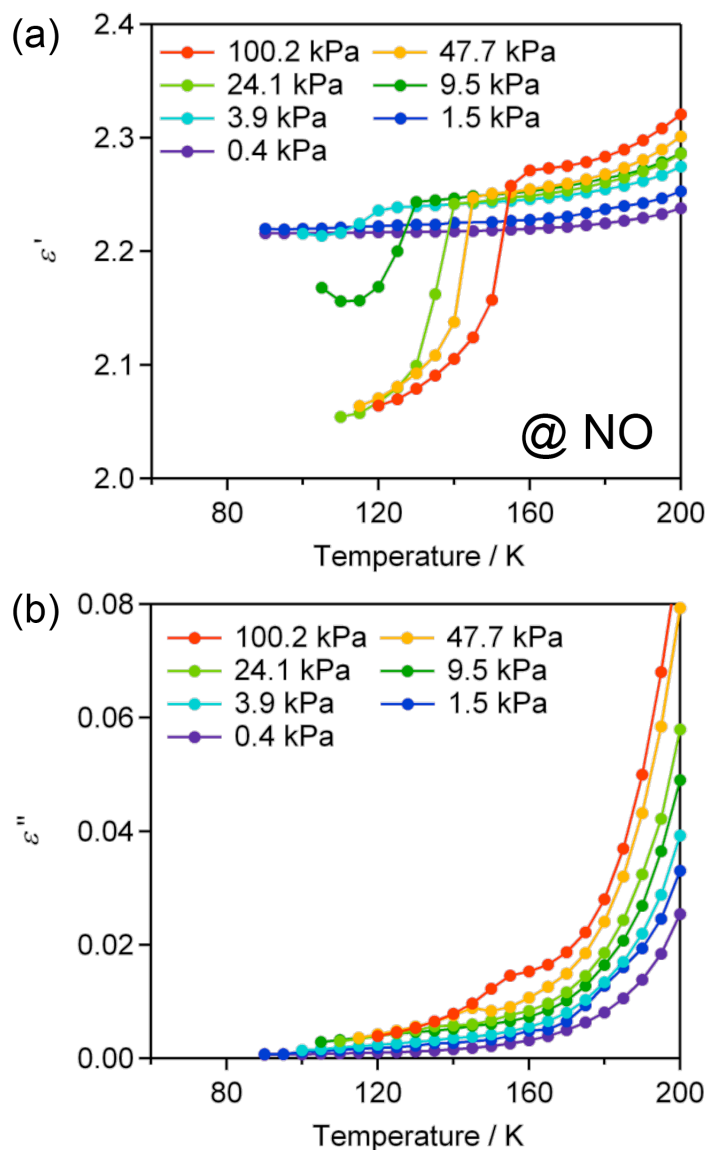

**Figure S7.** Temperature dependence of the dielectric constants, the real part ( $\epsilon'$ ) (a) and the imaginary part ( $\epsilon''$ ) (b), for **1** measured on heating under various pressure of NO with an ac electric field frequency of 0.1 kHz.

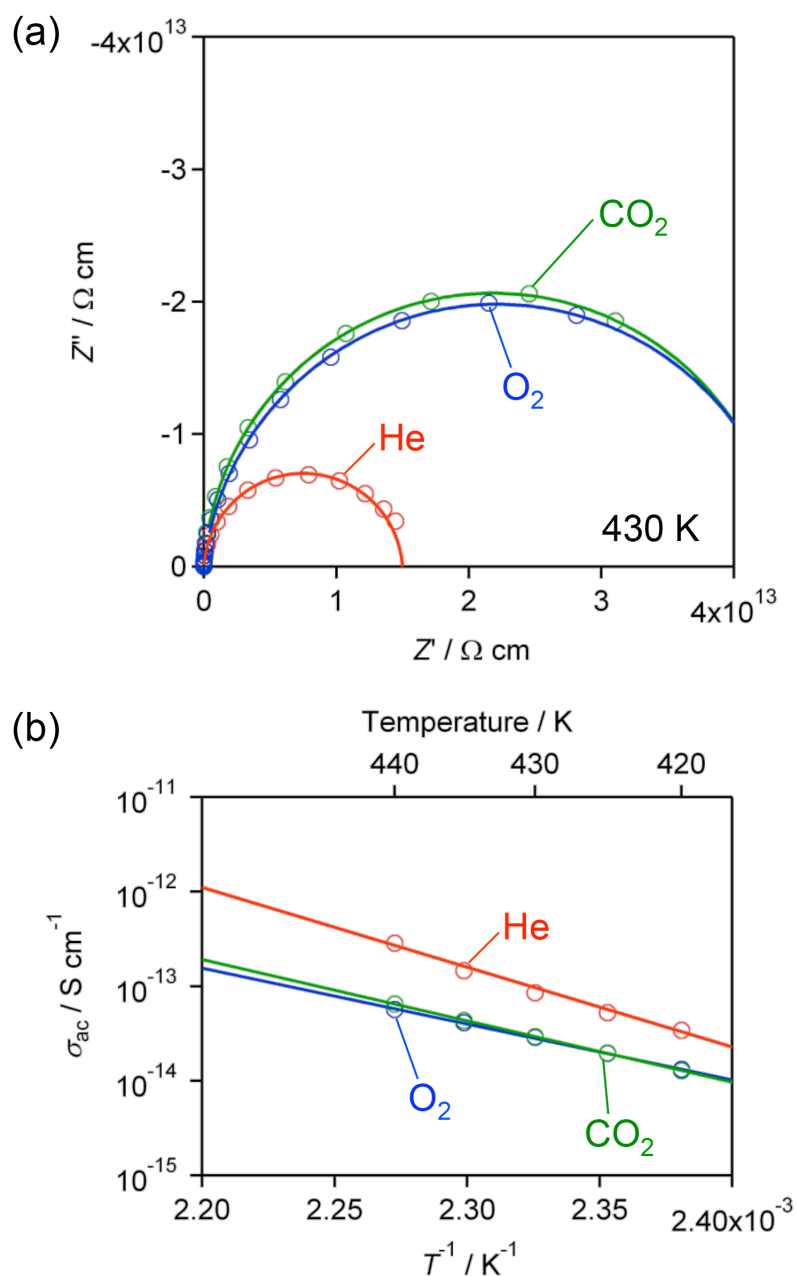

**Figure S8.** Nyquist plots for **2** at 430 K (a), where the solid lines represent simulation curves based on a generalized Debye equation with a  $\beta$  value in the range of 0.92–0.97, and the Arrhenius plots (b) of  $\sigma_{ac}$  estimated from the Nyquist plots measured at several temperatures under 100 kPa of He (red),  $\text{CO}_2$  (green), and  $\text{O}_2$  (blue). The activation energy ( $E_a$ ) is listed in Table 1.

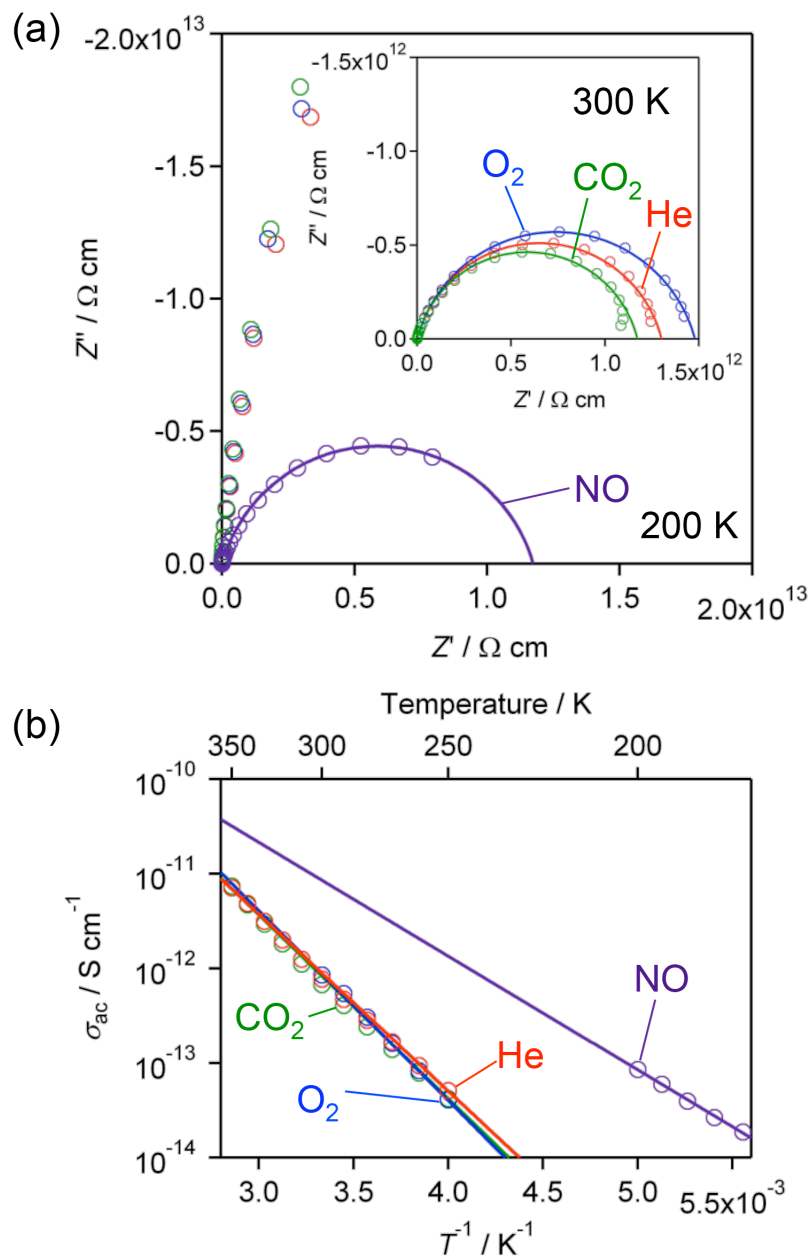

**Figure S9.** Nyquist plots for **3** at 200 K (a) and 300 K (a, inset), where the solid lines represent simulation curves based on a generalized Debye equation with a  $\beta$  value in the range of 0.78–0.85, and the Arrhenius plots (b) of  $\sigma_{ac}$  estimated from the Nyquist plots measured at several temperatures under 100 kPa of He (red), CO<sub>2</sub> (green), O<sub>2</sub> (blue), and NO (violet). The activation energy ( $E_a$ ) is listed in Table 1.

## References

---

- (1) Cotton, F. A.; Walton, R. A. *Multiple Bonds Between Metal Atoms*, 2nd ed., Oxford University Press: Oxford, 1993.
- (2) Kahn, O. *Molecular Magnetism*; VCH: New York, 1993.
- (3) Kosaka, W.; Yamagishi, K.; Hori, A.; Sato, H.; Matsuda, R.; Kitagawa, S.; Takata, M.; Miyasaka, H. *J. Am. Chem. Soc.* **2013**, *135*, 18469.
- (4) Matsuda, R.; Kitaura, R.; Kitagawa, S.; Kubota, Y.; Kobayashi, T. C.; Horike, S.; Takata, M. *J. Am. Chem. Soc.* **2004**, *126*, 14063–14070.
